# Supplementary material for: Leicester Cough Questionnaire validation and clinically important thresholds for change in refractory or unexplained chronic cough
Source: PubMed Central journal article supplement (PMC9149626; doi:10.1177/17534666221099737), 2022-05-25

## SUPPLEMENTARY FIGURES

**Supplementary Figure S1.** Leicester Cough Questionnaire items by domain. Numbers represent corresponding question numbers (or item numbers) in questionnaire.

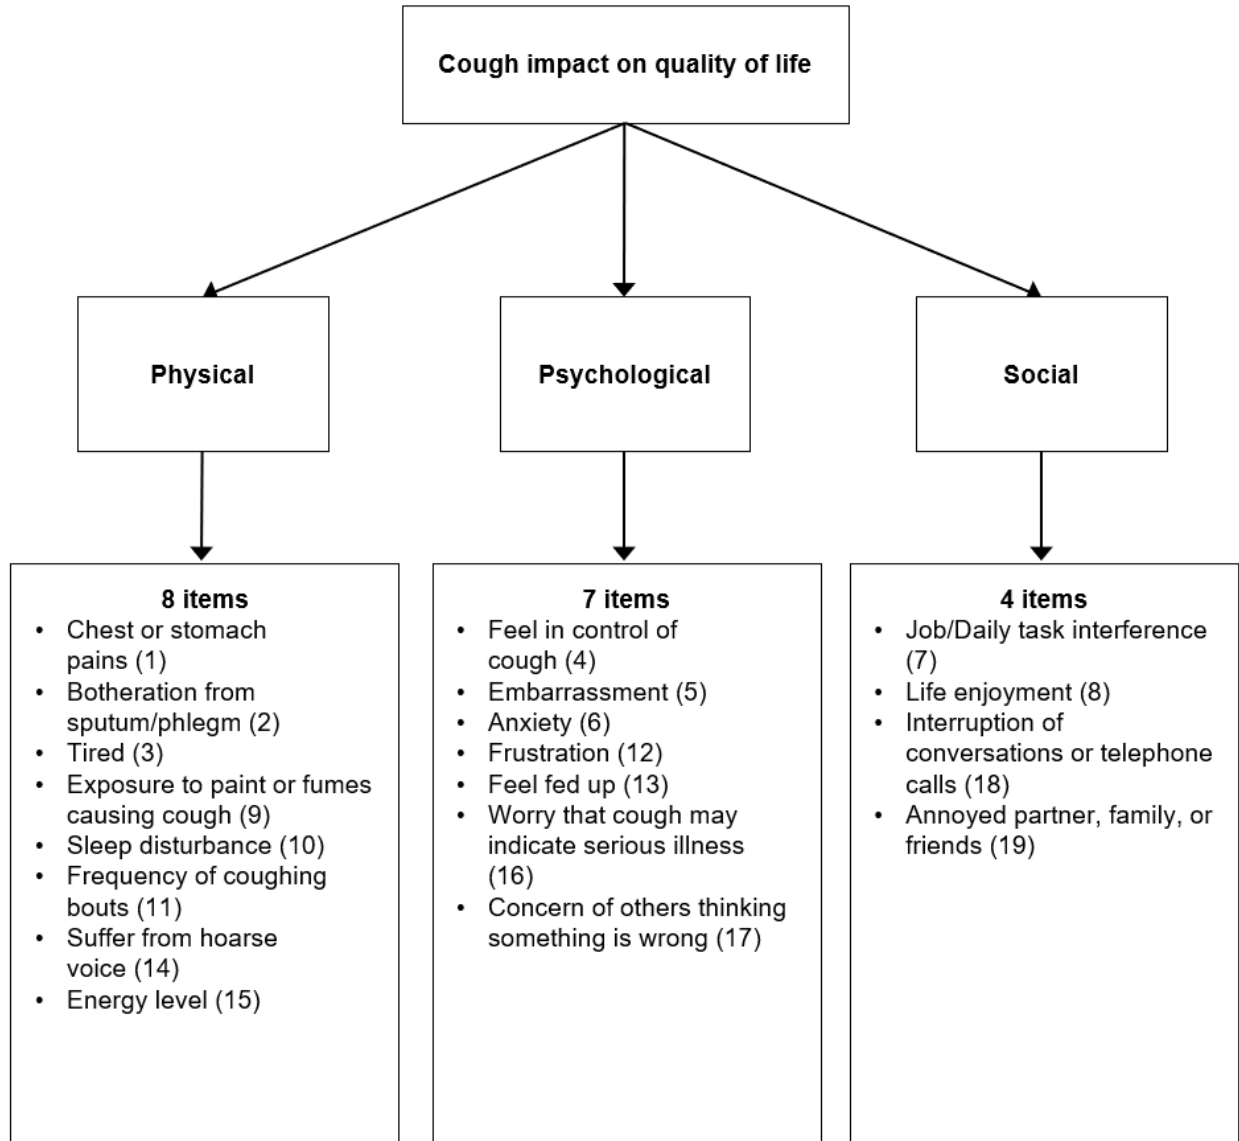

**Supplementary Figure S2.** ROC curves for the LCQ **(A)** total, **(B)** physical, **(C)** psychological, and **(D)** social score changes for predicting global improvements based on the PGIC (scores of 1 to 3) at Week 4. LCQ, Leicester Cough Questionnaire; PGIC, patient global impression of change; ROC, receiver operating characteristic.

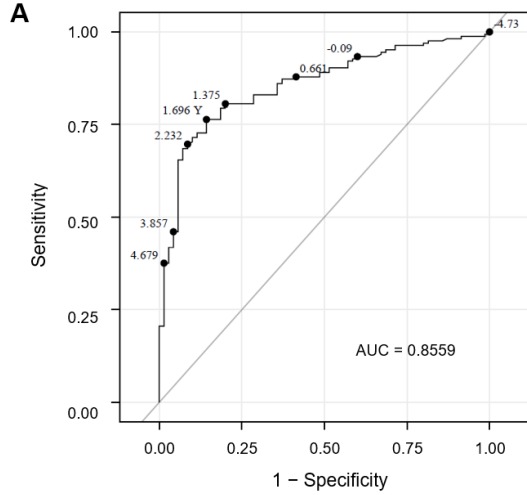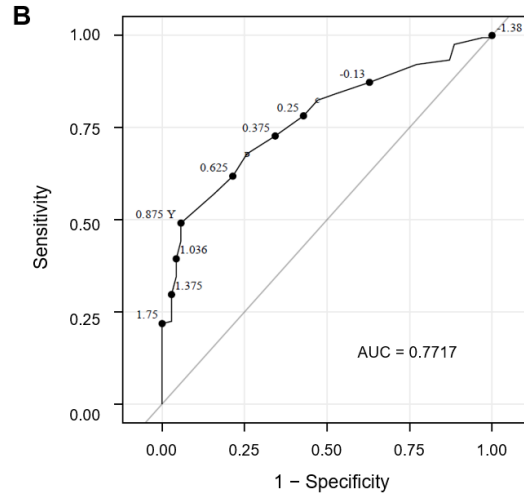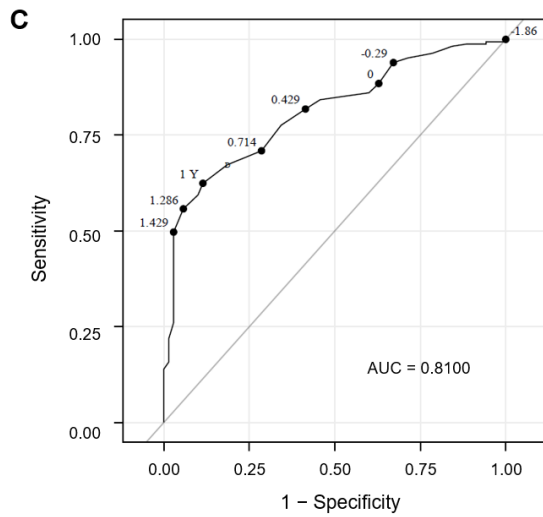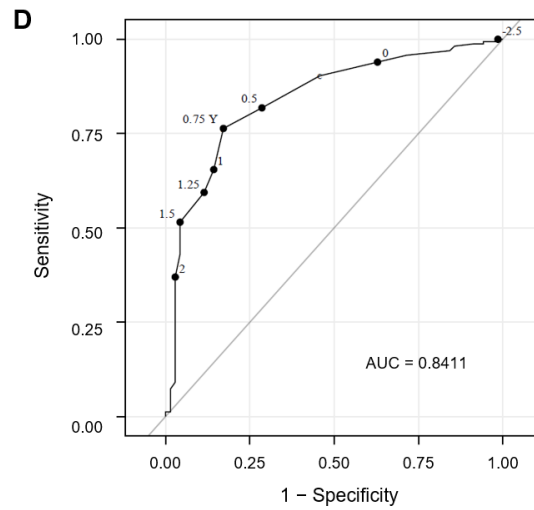

**Supplementary Figure S3.** ROC curve for the LCQ total score change for predicting global improvements based on the PGIC (scores of 1 to 2) at Week 4. Leicester Cough Questionnaire; PGIC, patient global impression of change; ROC, receiver operating characteristic.

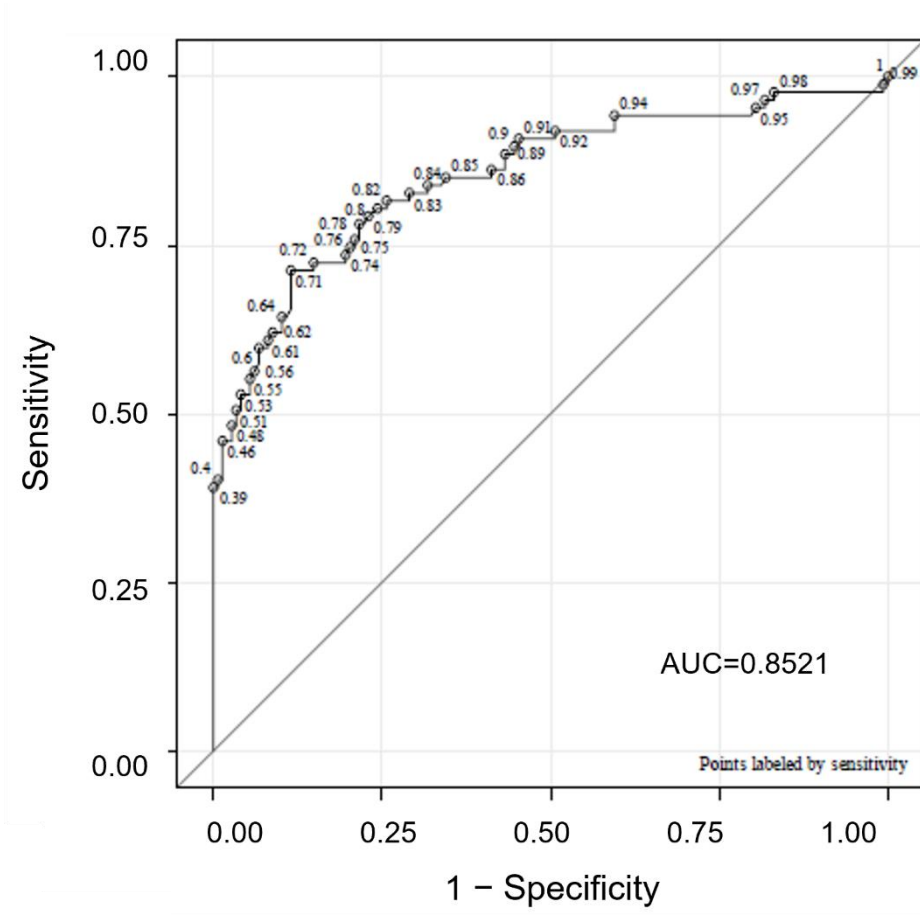

Supplement: sj-pdf-1-tar-10.1177_17534666221099737.pdf [file sj-pdf-1-tar-10.1177_17534666221099737.pdf]
