# Supplementary material for: Leicester Cough Questionnaire validation and clinically important thresholds for change in refractory or unexplained chronic cough
Source: PubMed Central journal article supplement (PMC9149626; doi:10.1177/17534666221099737), 2022-05-25
Supplement: sj-pdf-3-tar-10.1177_17534666221099737.pdf [file sj-pdf-3-tar-10.1177_17534666221099737.pdf]

## SUPPLEMENTARY TABLES

**Supplementary Table S1.** Leicester Cough Questionnaire Item-Level Descriptive Statistics at Baseline and Week 4<sup>a</sup>

| <b>Measures</b> | <b>Baseline<br/>(N=253)</b> | <b>Week 4<br/>(N=236)</b> |
|-----------------|-----------------------------|---------------------------|
| <b>Item 1</b>   |                             |                           |
| Mean (SD)       | 5.7 (1.6)                   | 6.4 (1.2)                 |
| Range           | 1.0, 7.0                    | 1.0, 7.0                  |
| Floor, n (%)    | 8 (3.2)                     | 3 (1.3)                   |
| Ceiling, n (%)  | 118 (46.6)                  | 161 (68.2)                |
| <b>Item 2</b>   |                             |                           |
| Mean (SD)       | 4.3 (1.8)                   | 4.8 (1.8)                 |
| Range           | 1.0, 7.0                    | 1.0, 7.0                  |
| Floor, n (%)    | 18 (7.1)                    | 10 (4.2)                  |
| Ceiling, n (%)  | 32 (12.6)                   | 53 (22.5)                 |
| <b>Item 3</b>   |                             |                           |
| Mean (SD)       | 4.3 (1.8)                   | 5.3 (1.8)                 |
| Range           | 1.0, 7.0                    | 1.0, 7.0                  |
| Floor, n (%)    | 23 (9.1)                    | 8 (3.4)                   |
| Ceiling, n (%)  | 34 (13.4)                   | 80 (33.9)                 |
| <b>Item 4</b>   |                             |                           |
| Mean (SD)       | 3.2 (1.7)                   | 4.5 (1.8)                 |
| Range           | 1.0, 7.0                    | 1.0, 7.0                  |
| Floor, n (%)    | 44 (17.4)                   | 20 (8.5)                  |
| Ceiling, n (%)  | 11 (4.3)                    | 38 (16.1)                 |
| <b>Item 5</b>   |                             |                           |
| Mean (SD)       | 4.7 (1.8)                   | 5.6 (1.6)                 |
| Range           | 1.0, 7.0                    | 1.0, 7.0                  |
| Floor, n (%)    | 14 (5.5)                    | 5 (2.1)                   |
| Ceiling, n (%)  | 50 (19.8)                   | 94 (39.8)                 |
| <b>Item 6</b>   |                             |                           |
| Mean (SD)       | 4.4 (1.6)                   | 5.3 (1.6)                 |
| Range           | 1.0, 7.0                    | 1.0, 7.0                  |
| Floor, n (%)    | 16 (6.3)                    | 5 (2.1)                   |
| Ceiling, n (%)  | 25 (9.9)                    | 75 (31.8)                 |
| <b>Item 7</b>   |                             |                           |
| Mean (SD)       | 3.6 (1.5)                   | 4.9 (1.6)                 |
| Range           | 1.0, 7.0                    | 1.0, 7.0                  |
| Floor, n (%)    | 21 (8.3)                    | 10 (4.2)                  |
| Ceiling, n (%)  | 10 (4.0)                    | 45 (19.1)                 |
| <b>Item 8</b>   |                             |                           |
| Mean (SD)       | 4.7 (2.2)                   | 5.4 (2.0)                 |
| Range           | 1.0, 7.0                    | 1.0, 7.0                  |
| Floor, n (%)    | 29 (11.5)                   | 14 (5.9)                  |
| Ceiling, n (%)  | 90 (35.6)                   | 115 (48.7)                |
| <b>Item 9</b>   |                             |                           |
| Mean (SD)       | 4.4 (1.9)                   | 5.4 (1.5)                 |
| Range           | 1.0, 7.0                    | 1.0, 7.0                  |
| Floor, n (%)    | 25 (9.9)                    | 6 (2.5)                   |
| Ceiling, n (%)  | 45 (17.8)                   | 70 (29.7)                 |

|                |            |            |
|----------------|------------|------------|
| <b>Item 10</b> |            |            |
| Mean (SD)      | 3.5 (1.3)  | 4.3 (1.5)  |
| Range          | 1.0, 7.0   | 1.0, 7.0   |
| Floor, n (%)   | 17 (6.7)   | 12 (5.1)   |
| Ceiling, n (%) | 5 (2.0)    | 15 (6.4)   |
| <b>Item 11</b> |            |            |
| Mean (SD)      | 3.2 (1.6)  | 4.5 (1.9)  |
| Range          | 1.0, 7.0   | 1.0, 7.0   |
| Floor, n (%)   | 45 (17.8)  | 22 (9.3)   |
| Ceiling, n (%) | 8 (3.2)    | 39 (16.5)  |
| <b>Item 12</b> |            |            |
| Mean (SD)      | 3.3 (1.8)  | 4.7 (2.0)  |
| Range          | 1.0, 7.0   | 1.0, 7.0   |
| Floor, n (%)   | 52 (20.6)  | 19 (8.1)   |
| Ceiling, n (%) | 16 (6.3)   | 64 (27.1)  |
| <b>Item 13</b> |            |            |
| Mean (SD)      | 4.9 (1.8)  | 5.5 (1.7)  |
| Range          | 1.0, 7.0   | 1.0, 7.0   |
| Floor, n (%)   | 11 (4.3)   | 6 (2.5)    |
| Ceiling, n (%) | 69 (27.3)  | 102 (43.2) |
| <b>Item 14</b> |            |            |
| Mean (SD)      | 5.5 (1.9)  | 6.1 (1.4)  |
| Range          | 1.0, 7.0   | 1.0, 7.0   |
| Floor, n (%)   | 13 (5.1)   | 3 (1.3)    |
| Ceiling, n (%) | 115 (45.5) | 140 (59.3) |
| <b>Item 15</b> |            |            |
| Mean (SD)      | 3.3 (1.8)  | 4.4 (2.0)  |
| Range          | 1.0, 7.0   | 1.0, 7.0   |
| Floor, n (%)   | 54 (21.3)  | 29 (12.3)  |
| Ceiling, n (%) | 16 (6.3)   | 41 (17.4)  |
| <b>Item 16</b> |            |            |
| Mean (SD)      | 3.1 (1.4)  | 4.2 (1.7)  |
| Range          | 1.0, 7.0   | 1.0, 7.0   |
| Floor, n (%)   | 35 (13.8)  | 12 (5.1)   |
| Ceiling, n (%) | 1 (0.4)    | 27 (11.4)  |
| <b>Item 17</b> |            |            |
| Mean (SD)      | 3.1 (1.7)  | 4.4 (1.9)  |
| Range          | 1.0, 7.0   | 1.0, 7.0   |
| Floor, n (%)   | 52 (20.6)  | 21 (8.9)   |
| Ceiling, n (%) | 13 (5.1)   | 45 (19.1)  |
| <b>Item 18</b> |            |            |
| Mean (SD)      | 2.7 (1.8)  | 3.9 (2.0)  |
| Range          | 1.0, 7.0   | 1.0, 7.0   |
| Floor, n (%)   | 79 (31.2)  | 35 (14.8)  |
| Ceiling, n (%) | 17 (6.7)   | 21 (8.9)   |
| <b>Item 19</b> |            |            |
| Mean (SD)      | 3.8 (1.6)  | 4.1 (1.7)  |
| Range          | 1.0, 7.0   | 1.0, 7.0   |
| Floor, n (%)   | 21 (8.3)   | 16 (6.8)   |
| Ceiling, n (%) | 10 (4.0)   | 12 (5.1)   |

Floor = minimum response >25%; ceiling = maximum response >25%. <sup>a</sup>All items range from 1 to 7.

**Supplementary Table S2.** Confirmatory Factor Loadings Using a 3-Factor Nonhierarchical Model of the LCQ at Baseline (N=253)

| LCQ item                                                                  | Factor loadings |
|---------------------------------------------------------------------------|-----------------|
| Physical domain                                                           |                 |
| Item 1: Chest or stomach pains due to cough                               | 0.489           |
| Item 2: Bothered by sputum production with cough                          | 0.188           |
| Item 3: Tired because of cough                                            | 0.684           |
| Item 9: Exposure to paint or fumes made me cough                          | 0.618           |
| Item 10: Cough disturbed sleep                                            | 0.628           |
| Item 11: Coughing bouts per day                                           | 0.718           |
| Item 14: Hoarse voice because of cough                                    | 0.339           |
| Item 15: Had a lot of energy                                              | 0.757           |
| Psychological domain                                                      |                 |
| Item 4: Felt in control of cough                                          | 0.766           |
| Item 5: Felt embarrassed by cough                                         | 0.648           |
| Item 6: Felt anxious by cough                                             | 0.585           |
| Item 12: Felt frustrated by cough                                         | 0.755           |
| Item 13: Felt fed up with cough                                           | 0.462           |
| Item 16: Worried cough indicates serious illness                          | 0.701           |
| Item 17: Concerned other people think something is wrong because of cough | 0.684           |
| Social domain                                                             |                 |
| Item 7: Cough interfered with job or other daily tasks                    | 0.717           |
| Item 8: Cough interfered with overall enjoyment of life                   | 0.421           |
| Item 18: Cough interrupted conversation or telephone calls                | 0.337           |
| Item 19: Cough annoyed partner, family, or friends                        | 0.333           |

$\chi^2(144) = 268.05$  ( $P < 0.0001$ ); CFI = 0.929; RMSEA = 0.058 (90% CI: 0.047, 0.069); SRMR = 0.053. CFI, comparative-fit index; LCQ, Leicester Cough Questionnaire; RMSEA, root mean square error of approximation; SRMR, standardized root mean square residual.

**Supplementary Table S3.** Test-Retest Reliability (Reproducibility) of LCQ Scores From Baseline to Week 4

| <b>LCQ domains</b>                                | <b>Baseline,<br/>mean<br/>(SD)</b> | <b>Week 4,<br/>mean<br/>(SD)</b> | <b>Difference<sup>a</sup></b> | <b>P value</b> | <b>Pearson <i>r</i><sup>b</sup></b> | <b>ICC</b> |
|---------------------------------------------------|------------------------------------|----------------------------------|-------------------------------|----------------|-------------------------------------|------------|
| ≤10% change in<br>awake cough<br>frequency (n=32) |                                    |                                  |                               |                |                                     |            |
| Total score                                       | 12.1 (3.33)                        | 12.7 (3.21)                      | 0.7                           | 0.1105         | 0.76                                | 0.75       |
| Physical                                          | 4.6 (1.04)                         | 4.7 (0.93)                       | 0.1                           | 0.2045         | 0.84                                | 0.83       |
| Psychological                                     | 3.8 (1.28)                         | 4.0 (1.26)                       | 0.2                           | 0.1188         | 0.77                                | 0.76       |
| Social                                            | 3.7 (1.38)                         | 4.0 (1.32)                       | 0.3                           | 0.2391         | 0.52                                | 0.51       |
| No change on<br>PGIC (n=61)                       |                                    |                                  |                               |                |                                     |            |
| Total score                                       | 11.4 (2.75)                        | 11.9 (2.89)                      | 0.5                           | 0.0273         | 0.80                                | 0.79       |
| Physical                                          | 4.5 (0.90)                         | 4.6 (0.87)                       | 0.1                           | 0.1391         | 0.79                                | 0.78       |
| Psychological                                     | 3.5 (1.12)                         | 3.7 (1.14)                       | 0.2                           | 0.0917         | 0.70                                | 0.69       |
| Social                                            | 3.3 (1.22)                         | 3.6 (1.28)                       | 0.2                           | 0.1095         | 0.65                                | 0.64       |

ICC, intraclass correlation coefficient; LCQ, Leicester Cough Questionnaire; PGIC, patient global impression of change.

<sup>a</sup>Difference = Week 4 – baseline for daily score. <sup>b</sup>Pearson's product-moment correlation.

**Supplementary Table S4.** Pearson Correlations Between LCQ Scores and Conceptually Related Measures

|                                        | <b>Total</b> | <b>Physical</b> | <b>Psychological</b> | <b>Social</b> |
|----------------------------------------|--------------|-----------------|----------------------|---------------|
| <b>LCQ score at Week 4<sup>a</sup></b> |              |                 |                      |               |
| CSD                                    |              |                 |                      |               |
| Total score                            | -0.76        | -0.69           | -0.69                | -0.73         |
| Frequency                              | -0.75        | -0.65           | -0.71                | -0.73         |
| Intensity                              | -0.74        | -0.69           | -0.68                | -0.71         |
| Disruption                             | -0.65        | -0.64           | -0.57                | -0.62         |
| Cough severity VAS                     | -0.70        | -0.60           | -0.65                | -0.69         |

CSD, Cough Severity Diary; LCQ, Leicester Cough Questionnaire; VAS, visual analog scale. <sup>a</sup>Pearson correlation coefficients reported; all are  $P < 0.0001$ .

**Supplementary Table S5.** Pearson Correlations Between Change From Baseline in LCQ Total Score and Percentage Changes From Baseline in Awake and 24-Hour Objective Cough Frequency at Week 4 (n=228)

|                                                      | <b>Percentage change in<br/>awake cough frequency<sup>a</sup></b> | <b>Percentage change in<br/>24-hour cough frequency<sup>a</sup></b> |
|------------------------------------------------------|-------------------------------------------------------------------|---------------------------------------------------------------------|
| Change in LCQ total score<br>from baseline to Week 4 | -0.53                                                             | -0.53                                                               |

LCQ, Leicester Cough Questionnaire. <sup>a</sup>Pearson correlation coefficients reported; both are  $P < 0.0001$ .

**Supplementary Table S6.** Known-Groups Validity for LCQ Score at Week 4 by CSD Total Score at Week 4 and Awake Cough Frequency at Baseline and Week 4

| LCQ domain                              | Tertile group 1 |             | Tertile group 2 |             | Tertile group 3 |             | Overall<br>F value | P value |
|-----------------------------------------|-----------------|-------------|-----------------|-------------|-----------------|-------------|--------------------|---------|
|                                         | N               | Mean (SE)   | N               | Mean (SE)   | N               | Mean (SE)   |                    |         |
| <b>CSD (Week 4)</b>                     |                 |             |                 |             |                 |             |                    |         |
| Total score                             | 76              | 17.4 (0.32) | 75              | 14.9 (0.32) | 68              | 11.7 (0.34) | 74.68              | <0.0001 |
| Physical                                | 76              | 5.8 (0.09)  | 75              | 5.2 (0.10)  | 68              | 4.4 (0.10)  | 50.43              | <0.0001 |
| Psychological                           | 76              | 5.8 (0.13)  | 75              | 4.9 (0.13)  | 68              | 3.7 (0.14)  | 58.57              | <0.0001 |
| Social                                  | 76              | 5.8 (0.13)  | 75              | 4.7 (0.13)  | 68              | 3.6 (0.14)  | 67.44              | <0.0001 |
| <b>Awake cough frequency (baseline)</b> |                 |             |                 |             |                 |             |                    |         |
| Total score                             | 83              | 13.1 (0.31) | 84              | 11.2 (0.31) | 84              | 10.7 (0.31) | 16.12              | <0.0001 |
| Physical                                | 83              | 4.9 (0.11)  | 84              | 4.4 (0.10)  | 84              | 4.0 (0.10)  | 16.35              | <0.0001 |
| Psychological                           | 83              | 4.2 (0.13)  | 84              | 3.5 (0.13)  | 84              | 3.4 (0.13)  | 10.73              | <0.0001 |
| Social                                  | 83              | 4.0 (0.13)  | 84              | 3.3 (0.13)  | 84              | 3.3 (0.13)  | 11.20              | <0.0001 |
| <b>Awake cough frequency (Week 4)</b>   |                 |             |                 |             |                 |             |                    |         |
| Total score                             | 76              | 16.8 (0.36) | 77              | 15.0 (0.36) | 76              | 12.1 (0.36) | 42.03              | <0.0001 |
| Physical                                | 76              | 5.7 (0.10)  | 77              | 5.2 (0.10)  | 76              | 4.5 (0.10)  | 34.05              | <0.0001 |
| Psychological                           | 76              | 5.6 (0.14)  | 77              | 4.9 (0.14)  | 76              | 3.9 (0.14)  | 34.94              | <0.0001 |
| Social                                  | 76              | 5.5 (0.15)  | 77              | 4.9 (0.15)  | 76              | 3.7 (0.15)  | 35.84              | <0.0001 |

CSD, Cough Severity Diary; LCQ, Leicester Cough Questionnaire.

**Supplementary Table S7.** Responsiveness of LCQ Scores: LCQ Domains From Baseline to Week 4 by PGIC Category

| PGIC score        | N  | Baseline,<br>mean (SD) | Week 4,<br>mean (SD) | Mean score change <sup>a</sup> |            | Effect<br>size <sup>b</sup> |
|-------------------|----|------------------------|----------------------|--------------------------------|------------|-----------------------------|
|                   |    |                        |                      | Difference                     | Range      |                             |
| LCQ physical      |    |                        |                      |                                |            |                             |
| 1 or 2            | 87 | 4.4 (1.04)             | 5.8 (0.82)           | 1.4                            | -1.4, 4.0  | 1.3                         |
| 3                 | 78 | 4.5 (0.97)             | 5.0 (0.89)           | 0.5                            | -1.0, 2.4  | 0.5                         |
| 4                 | 61 | 4.5 (0.90)             | 4.6 (0.87)           | 0.1                            | -1.1, 1.6  | 0.1                         |
| 5                 | 5  | 3.4 (0.68)             | 3.3 (0.42)           | -0.1                           | -0.6, 0.8  | -0.1                        |
| 6 or 7            | 4  | 4.8 (0.97)             | 4.7 (1.49)           | -0.2                           | -1.0, 0.8  | -0.2                        |
| LCQ psychological |    |                        |                      |                                |            |                             |
| 1 or 2            | 87 | 3.9 (1.19)             | 5.9 (0.91)           | 2.0                            | -1.9, 4.7  | 1.7                         |
| 3                 | 78 | 3.8 (1.26)             | 4.6 (1.13)           | 0.9                            | -1.3, 3.6  | 0.7                         |
| 4                 | 61 | 3.5 (1.12)             | 3.7 (1.14)           | 0.2                            | -1.6, 2.9  | 0.2                         |
| 5                 | 5  | 3.2 (1.60)             | 3.0 (1.54)           | -0.1                           | -0.7, 0.6  | -0.1                        |
| 6 or 7            | 4  | 3.8 (1.38)             | 3.0 (1.25)           | -0.8                           | -1.1, -0.1 | -0.6                        |
| LCQ social        |    |                        |                      |                                |            |                             |
| 1 or 2            | 87 | 3.7 (1.14)             | 5.8 (1.03)           | 2.2                            | -2.5, 5.3  | 1.9                         |
| 3                 | 78 | 3.7 (1.18)             | 4.6 (1.03)           | 0.9                            | -1.0, 3.0  | 0.8                         |
| 4                 | 61 | 3.3 (1.22)             | 3.6 (1.28)           | 0.2                            | -3.0, 4.8  | 0.2                         |
| 5                 | 5  | 3.1 (1.68)             | 2.8 (1.39)           | -0.4                           | -1.0, 0.3  | -0.2                        |
| 6 or 7            | 4  | 4.1 (1.30)             | 2.5 (1.32)           | -1.6                           | -2.0, -1.0 | -1.3                        |

LCQ, Leicester Cough Questionnaire; PGIC, patient global impression of change. <sup>a</sup>Calculated as Week 4 – baseline.

<sup>b</sup>Calculated as score difference/SD of baseline score.

**Supplementary Table S8.** Responsiveness of LCQ Total Score: ANCOVA With LCQ Total Score Change From Baseline to Week 4 by 24-Hour Objective Cough Frequency Change at Week 4

| 24-hour objective cough frequency change | N   | LCQ total score change  |  | Overall F value |
|------------------------------------------|-----|-------------------------|--|-----------------|
|                                          |     | Least-squares mean (SE) |  |                 |
| ≥30% reduction                           |     |                         |  | 55.08*          |
| Responder                                | 126 | 4.3 (0.25)              |  | —               |
| Nonresponder                             | 102 | 1.1 (0.28)              |  | —               |
| ≥50% reduction                           |     |                         |  | 63.50*          |
| Responder                                | 79  | 5.2 (0.31)              |  | —               |
| Nonresponder                             | 149 | 1.6 (0.22)              |  | —               |
| ≥70% reduction                           |     |                         |  | 56.17*          |
| Responder                                | 50  | 5.9 (0.39)              |  | —               |
| Nonresponder                             | 178 | 2.0 (0.21)              |  | —               |
| ≥0.30 SD reduction                       |     |                         |  | 33.45*          |
| Responder                                | 123 | 3.9 (0.27)              |  | —               |
| Nonresponder                             | 105 | 1.6 (0.29)              |  | —               |

ANCOVA, analysis of covariance; LCQ, Leicester Cough Questionnaire. \* $P < 0.0001$ .

**Supplementary Table S9.** ROC Curve Analysis for LCQ Total Score Thresholds Predictive of PGIC of 1 to 2 at Week 4

| <b>LCQ score-change threshold</b> | <b>Sensitivity</b> | <b>Specificity</b> | <b>Positive predictive value</b> | <b>Negative predictive value</b> | <b>Youden index</b> |
|-----------------------------------|--------------------|--------------------|----------------------------------|----------------------------------|---------------------|
| Total score                       |                    |                    |                                  |                                  |                     |
| ≥1.0                              | 0.92               | 0.47               | 0.51                             | 0.91                             | 0.39                |
| ≥1.3                              | 0.91               | 0.52               | 0.53                             | 0.91                             | 0.43                |
| ≥1.5                              | 0.89               | 0.56               | 0.54                             | 0.89                             | 0.45                |
| ≥1.7                              | 0.85               | 0.59               | 0.55                             | 0.87                             | 0.44                |
| ≥2.0                              | 0.85               | 0.64               | 0.58                             | 0.88                             | 0.49                |
| ≥2.1                              | 0.85               | 0.65               | 0.59                             | 0.88                             | 0.50                |
| ≥2.2                              | 0.84               | 0.66               | 0.59                             | 0.88                             | 0.50                |
| ≥2.3                              | 0.83               | 0.68               | 0.61                             | 0.87                             | 0.51                |
| ≥2.4                              | 0.83               | 0.70               | 0.62                             | 0.87                             | 0.53                |
| ≥2.5                              | 0.83               | 0.71               | 0.63                             | 0.88                             | 0.54                |
| ≥2.6                              | 0.82               | 0.71               | 0.62                             | 0.87                             | 0.53                |
| ≥2.7                              | 0.82               | 0.74               | 0.65                             | 0.87                             | 0.55                |
| ≥2.8                              | 0.80               | 0.76               | 0.66                             | 0.87                             | 0.56                |
| ≥2.9                              | 0.78               | 0.78               | 0.68                             | 0.86                             | 0.57                |
| ≥3.0                              | 0.75               | 0.79               | 0.68                             | 0.84                             | 0.54                |

LCQ, Leicester Cough Questionnaire; PGIC, patient global impression of change; ROC, receiver operating characteristic.
